# Supplementary figures and images for: Mapping of γ/δ T cells reveals Vδ2+ T cells resistance to senescence
Source: PubMed Central journal article supplement — eBioMedicine. 2018 Dec 7;39:44–58. doi: 10.1016/j.ebiom.2018.11.053 (PMC6354624; doi:10.1016/j.ebiom.2018.11.053), 2018-12-07

# SUPPLEMENTARY FIGURE 1

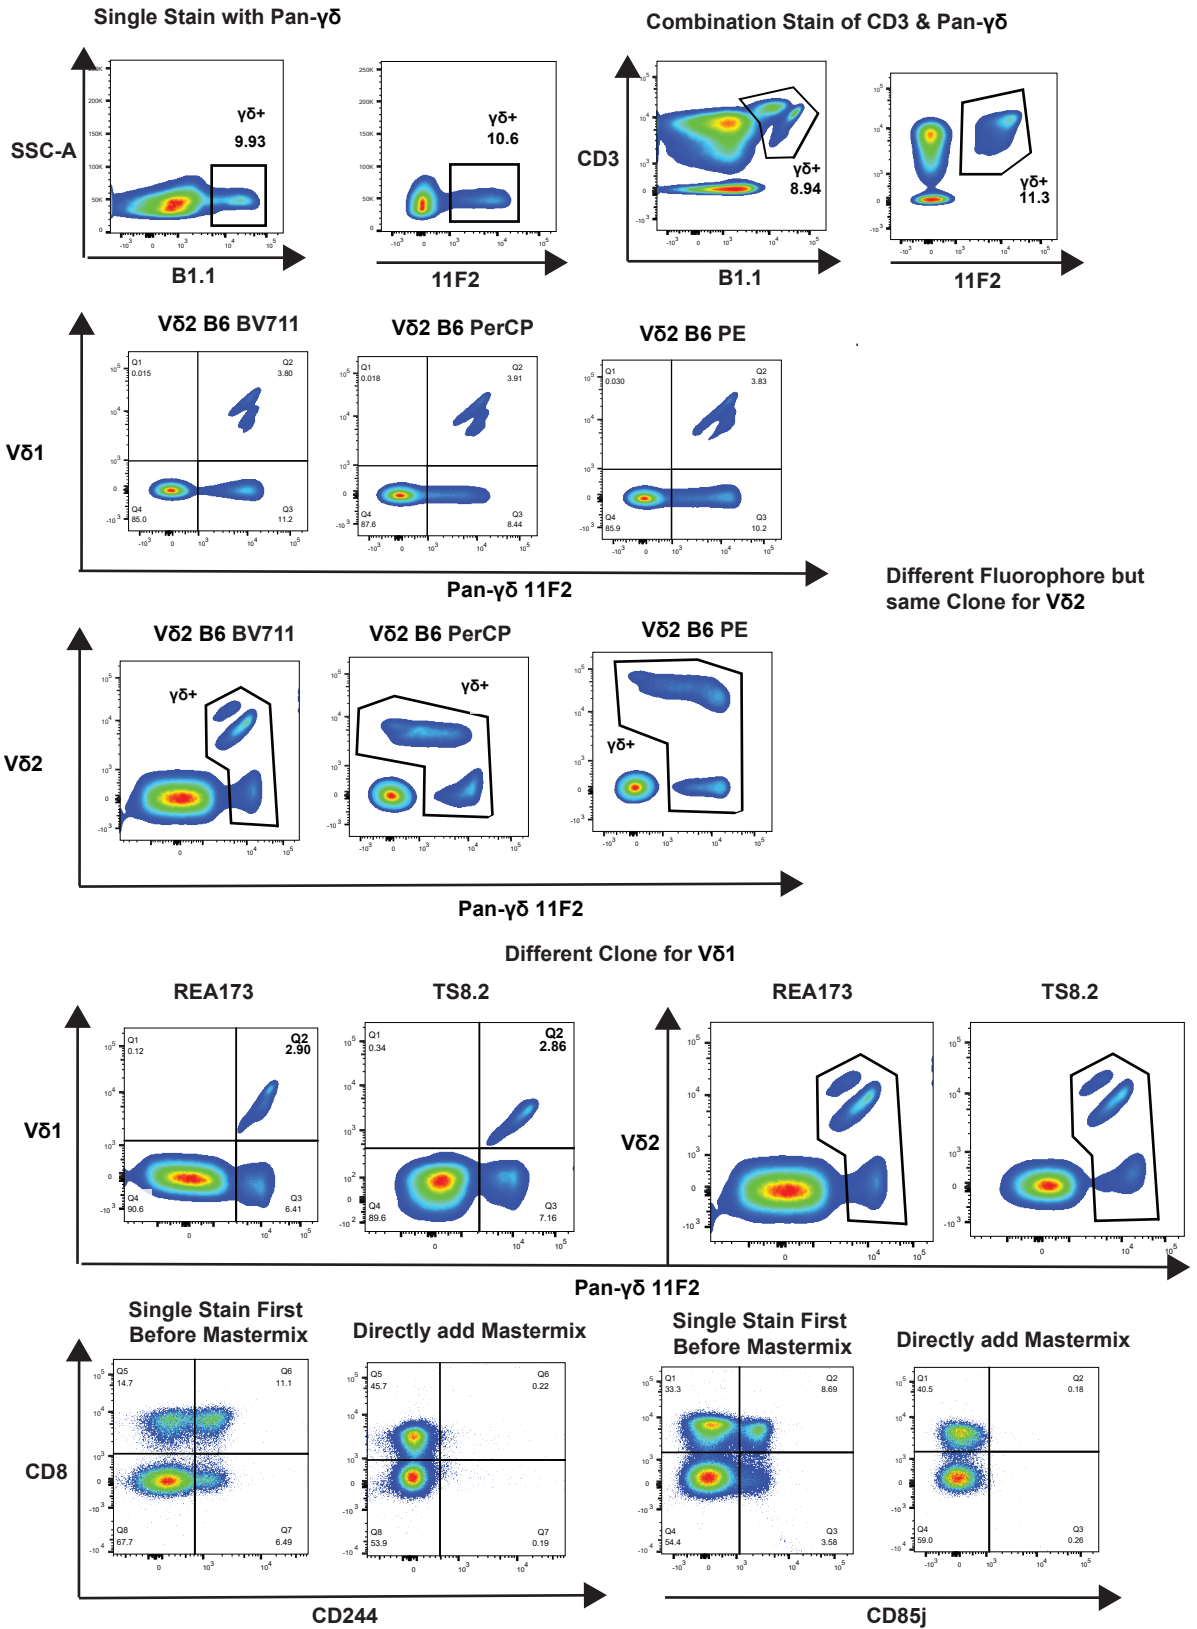



# SUPPLEMENTARY FIGURE 3

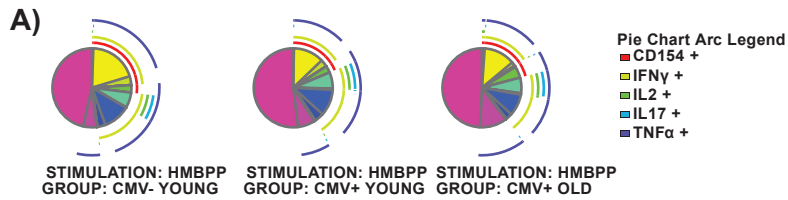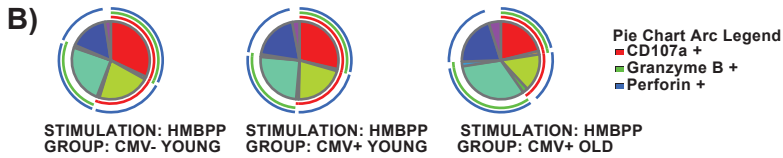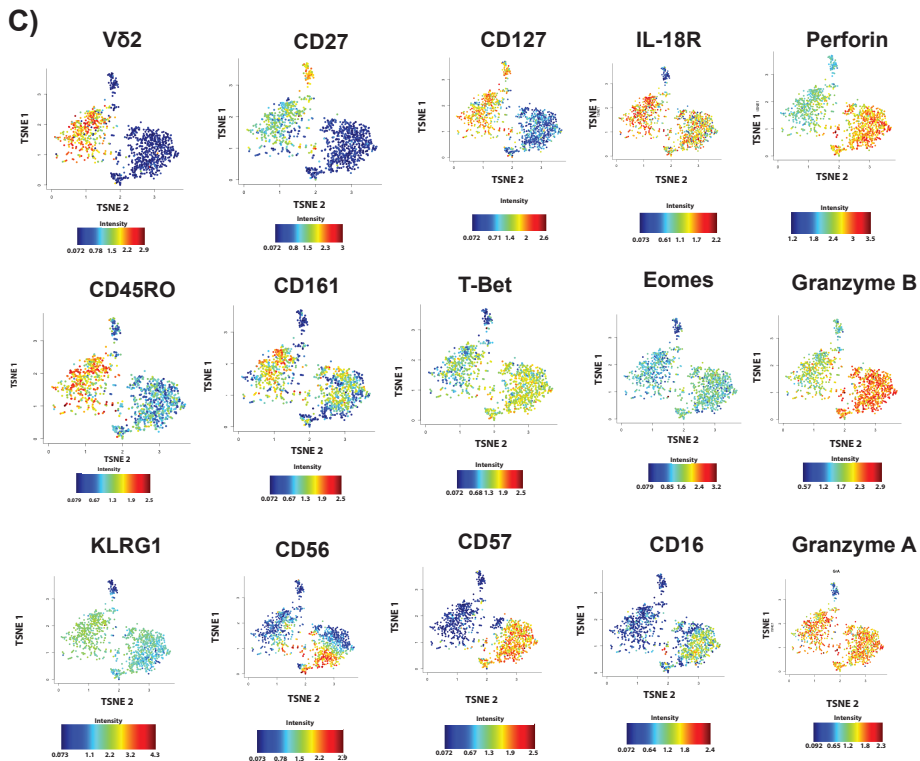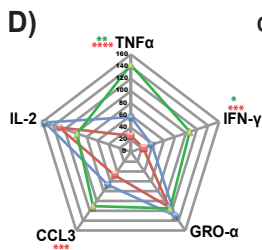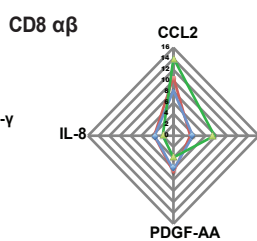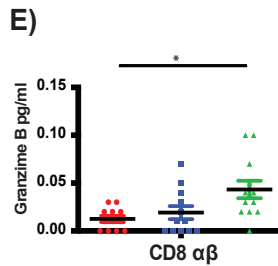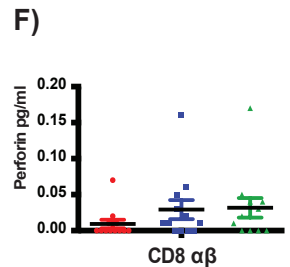

SUPPLEMENTARY FIGURE 4

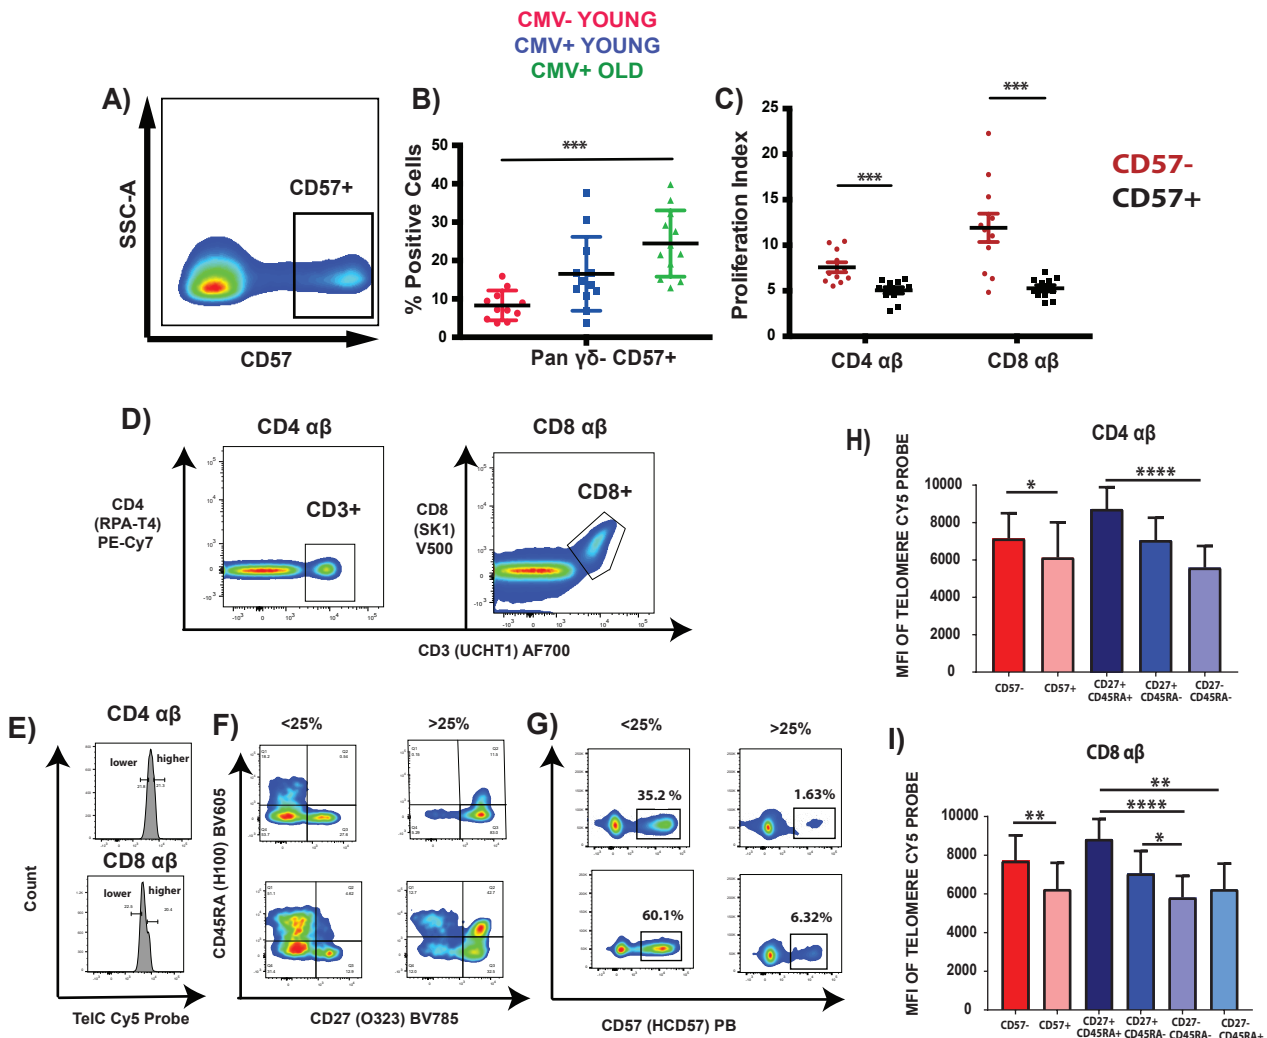

# SUPPLEMENTARY FIGURE 5

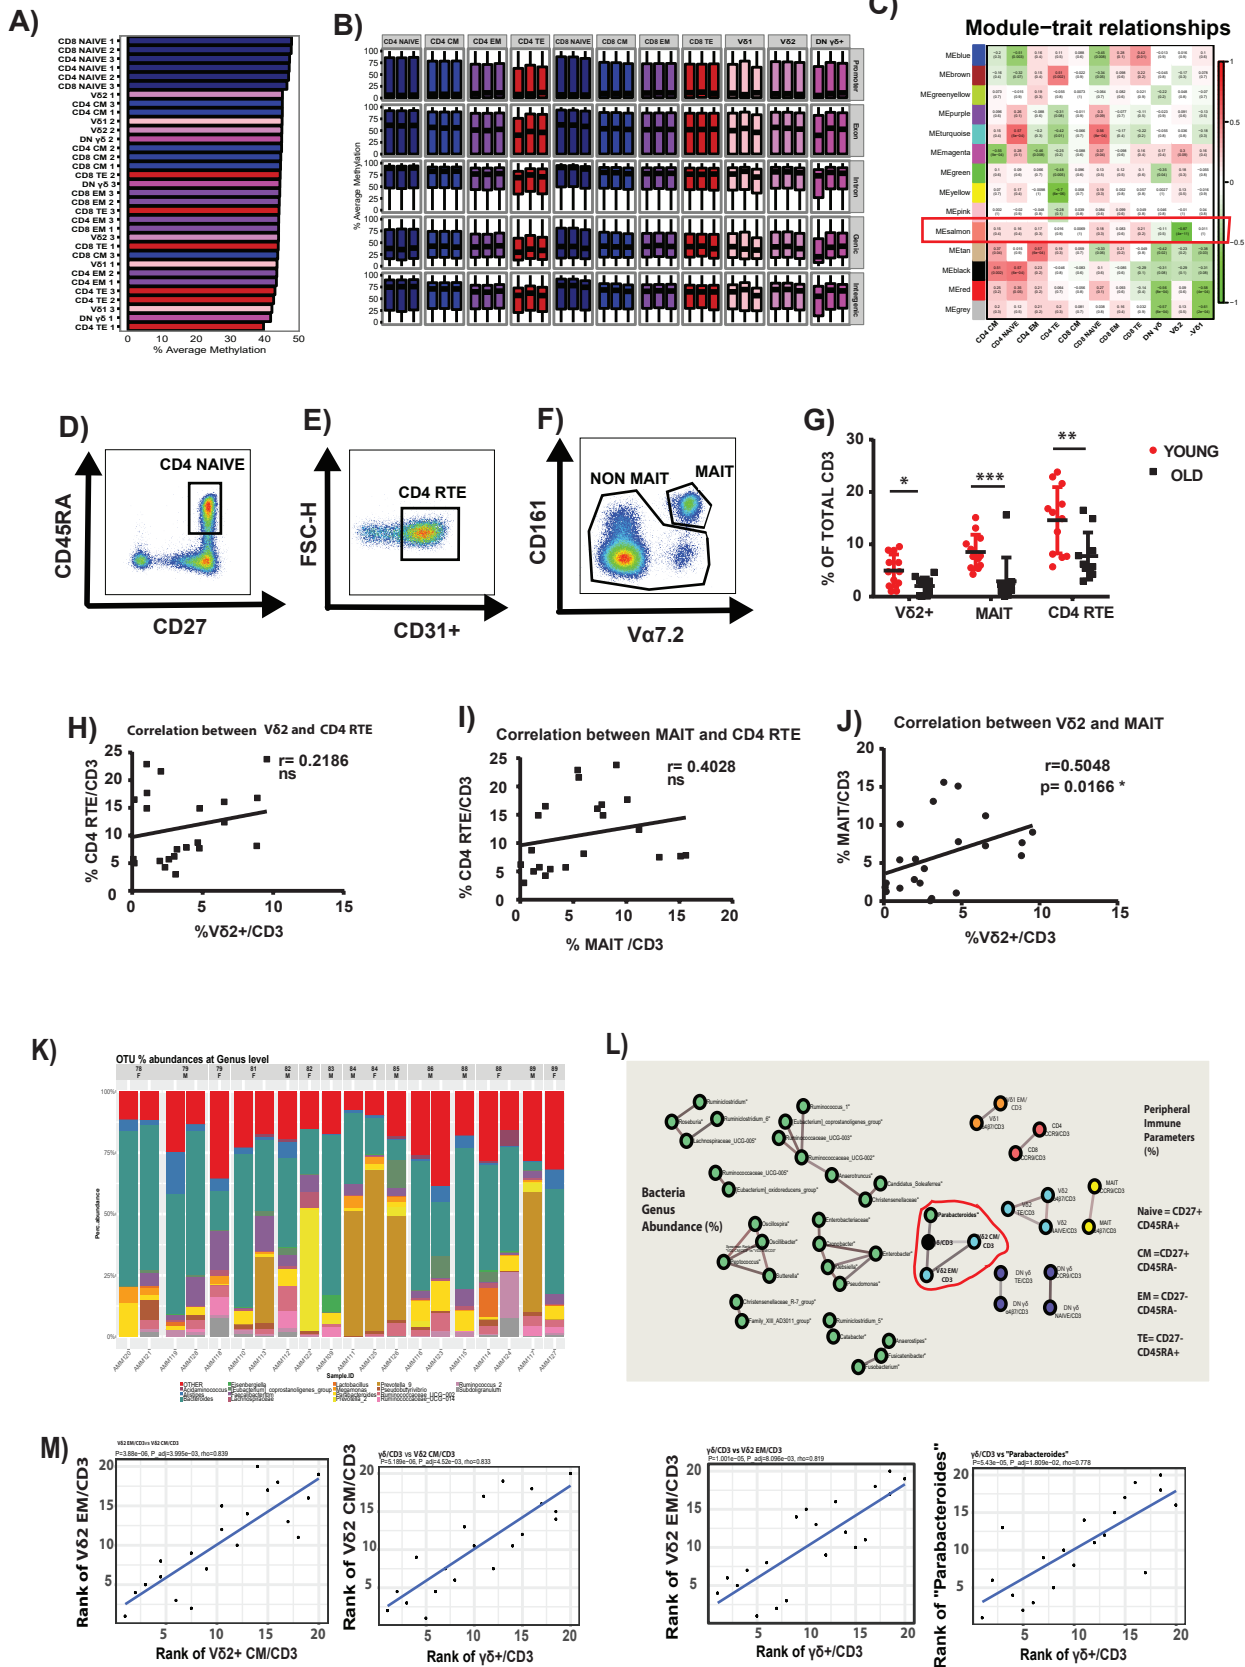

Supplement: mmc2.pdf [file mmc2.pdf]
